# Supplementary material
Source: ML conference proceedings conference paper supplement (https://openreview.net/forum?id=low-53sFqn)
Supplement: supplementary_material [file attachment]

## A Appendix

**Code Availability:** Our code will be made available upon acceptance.

The organization of the appendix is as follows:

1. Subsection A.1 provides the necessary background and preliminary information required for the proofs.
2. Subsection A.2 presents the proof of the optimality bound for the INTERACTIVE policy.
3. Subsection A.3 describes the details of the experimental setup.
4. Subsection A.4 contains additional results related to object detection experiments.
5. Subsection A.5 presents experimental analysis focusing on the diminishing return property.
6. Subsection A.6 reports the results of the experiments with non-submodular and non-monotone objectives.
7. Subsection A.7 includes the function evaluation and runtime complexity analysis of the algorithms.

### A.1 Preliminaries

Here, we provide basic definitions of submodular functions, monotone functions, and matroids that we use in our proof.

**Definition 2** (Submodular Function). *A set function  $f : 2^X \rightarrow \mathbb{R}$  is submodular if for all  $A \subseteq B \subseteq X$  and  $x \in X \setminus B$ , we have*

$$f(A \cup \{x\}) - f(A) \geq f(B \cup \{x\}) - f(B).$$

**Definition 3** (Monotone Function). *A set function  $f : 2^X \rightarrow \mathbb{R}$  is monotone if for all  $A \subseteq B \subseteq X$ , we have*

$$f(A) \leq f(B).$$

Based on the definitions of submodular and monotone functions, we can directly write the following:

**Corollary 1.** *Let  $f$  be a monotone submodular function. Then,  $f$  is also subadditive, and we have that:*

$$\forall A \subset X, B \subset X : f(B) \leq f(A) + \sum_{x \in B \setminus A} f_A(x).$$

Here, we denote the marginal gain of adding an element to set  $A$  as  $f_A(x) = f(A \cup \{x\}) - f(A)$ , which is also monotone and submodular.

*Proof.* This is a standard result in submodularity. See Corollary 5 in [66].  $\square$

**Definition 4** (Matroid). *A matroid is a pair  $M = (E, I)$  where  $E$  is a finite set (called the ground set) and  $I$  is a nonempty set of subsets of  $E$  (called the set of independent sets) with the following conditions:*

$$1. \forall B \in I : A \subset B \Rightarrow A \in I.$$

$$2. \forall A, B \in I : |A| < |B| \Rightarrow \exists x \in B \setminus A : A \cup \{x\} \in I.$$

**Definition 5** (Basis of a Matroid). *A basis of a matroid is an independent set of the matroid which is not contained in any other independent set.*

**Corollary 2.** *If  $B_1$  and  $B_2$  are two bases of a matroid  $M$ , then there exists a bijection  $\phi : B_1 \setminus B_2 \rightarrow B_2 \setminus B_1$  such that:*

$$\forall x \in B_1 \setminus B_2 : B_1 \cup \phi(\{x\}) \setminus \{x\} \in I.$$

*Proof.* This is a standard result in matroid theory. See Proposition 11 in [66].  $\square$

**Definition 6** (Partition Matroid). *A partition matroid is a matroid where the ground set  $E$  is partitioned into  $l$  disjoint subsets  $E_1, E_2, \dots, E_l$  and the set of independent sets is defined as follows:*

$$I = \{B \subseteq E : |B \cap E_i| \leq k_i, \forall i \in \{1, 2, \dots, l\}\}.$$

## 547 A.2 Proof of Optimality Bound for the Interactive Policy

548 First, we show that the robots' feasible action spaces  $\mathcal{A}^r$  and the union set of all observed data  $X^r$   
549 form a partition matroid.

550 **Lemma 2** (Robots' feasible action space and set of all observed images form Partition Matroid). *The*  
551 *robots' feasible action space  $\mathcal{A}^r$  and the union of all observed data  $X^r$  form a partition matroid*  
552  *$M^r = (X^r, \mathcal{A}^r)$ , where  $X^r = \bigcup_{i=1}^{N_{\text{robot}}} X_i^r$  and  $X_i^r \cap X_j^r = \emptyset \ \forall i \neq j$ . The action space is defined*  
553 *as  $\mathcal{A}^r = \{\bigcup_{i=1}^{N_{\text{robot}}} a_i^r : a_i^r \in \mathcal{A}_i^r \ \forall i = 1, \dots, N_{\text{robot}}\}$ .*

554 *Proof.* The proof follows directly from the definition of action and observed data points. For all  
555  $a \in \mathcal{A}^r$ , if  $s \subset a$ , then we know that for all  $j$ ,  $|s \cap X_j^r| \leq |a \cap X_j^r| \leq N_j^{\text{cache}}$  meaning  $s \in \mathcal{A}^r$ .  
556 And we know that for all  $a, s \in \mathcal{A}^r$ , if  $|s| < |a|$ , then there exists a subset  $X_j^r \subset X^r$  such that  
557  $|s \cap X_j^r| < |a \cap X_j^r| \leq N_j^{\text{cache}}$  and  $X_j^r \cap a \setminus s \neq \emptyset$ . Then for any element  $x \in X_j^r \cap a \setminus s$ , it holds  
558 that  $s \cup \{x\} \in \mathcal{A}^r$ .  $\square$

559 Now we prove the main theorem of our paper. Our proof is similar to the proof given in [66], while  
560 our proof involves sequential optimization methods, such as the one shown in Alg. 4.

561 **Theorem.** *The algorithm given in Alg. 4 achieves a solution greater than 1/2 of the optimal solu-*  
562 *tion.*

*Proof.* Assume that  $a^{\text{OPT}}$  is the optimal solution for the problem 1. First, we show that  $a^{\text{OPT}}$  and  
 $a^I$  are bases of the matroid  $(X^r, \mathcal{A}^r)$ . Since we assume that the objective function  $f$  is monotone  
(Assmp. 2), it is trivial to see that  $|a^{\text{OPT}} \cap X_i^r| = N_i^{\text{cache}}$  for all  $i \in \{1, \dots, N_{\text{robot}}\}$ , making  
 $a^{\text{OPT}}$  a basis of matroid  $(X^r, \mathcal{A}^r)$ .  $a^I$  is a basis as well, since in Alg. 4 we construct it such that  
 $|a^I \cap X_i^r| = N_i^{\text{cache}}$  for all  $i$ . For matroids, there exists a bijection  $\phi : a^{\text{OPT}} \rightarrow a^I$ , which maps the  
optimal solution to the solution of the INTERACTIVE policy. We can express these solution sets as  
follows:

$$a^{\text{OPT}} = \{x_{1,1}^{\text{OPT}}, x_{1,2}^{\text{OPT}}, \dots, x_{N_{\text{robot}}, N_{\text{robot}}^{\text{cache}}}^{\text{OPT}}\} \quad \text{and} \quad a^I = \{x_{1,1}, x_{1,2}, \dots, x_{N_{\text{robot}}, N_{\text{robot}}^{\text{cache}}}\}.$$

563 Here  $x_{i,j} = \phi(x_{i,j}^{\text{OPT}})$  for all  $i, j$ . Let  $a_{i,j}^I = \{x_{1,1}, \dots, x_{i,j}\}$  and  $a_{i,0}^I = \{x_{1,1}, \dots, x_{i-1, N_{i-1}^{\text{cache}}}\}$   
564 denote the sets of actions taken up to the  $i$ -th robot and the  $j$ -th cache and actions taken up to the  
565  $i$ -th robot respectively. Then for  $f_{\mathcal{D}_c^r}(x) = f(\mathcal{D}_c^r \cup \{x\}) - f(\mathcal{D}_c^r)$ , we can write the following:

$$\begin{aligned} f_{\mathcal{D}_c^r}(a^{\text{OPT}}) - f_{\mathcal{D}_c^r}(a^I) &\leq \sum_{i=1}^{N_{\text{robot}}} \sum_{j=1}^{N_i^{\text{cache}}} f_{\mathcal{D}_c^r \cup a^I}(x_{i,j}^{\text{OPT}}) \\ &\leq \sum_{i=1}^{N_{\text{robot}}} \sum_{j=1}^{N_i^{\text{cache}}} f_{\mathcal{D}_c^r \cup a_{i,j-1}^I}(x_{i,j}^{\text{OPT}}) \\ &\leq \sum_{i=1}^{N_{\text{robot}}} \sum_{j=1}^{N_i^{\text{cache}}} f_{\mathcal{D}_c^r \cup a_{i,j-1}^I}(x_{i,j}) \\ &= \sum_{i=1}^{N_{\text{robot}}} \sum_{j=1}^{N_i^{\text{cache}}} f_{\mathcal{D}_c^r}(a_{i,j}^I) - f_{\mathcal{D}_c^r}(a_{i,j-1}^I) = f_{\mathcal{D}_c^r}(a^I). \end{aligned}$$

566 The first inequality is a result of Corollary 1, while the second inequality stems from the submodu-  
567 larity of the function  $f_{\mathcal{D}_c^r}$ . In the third inequality, we utilize the fact that in each iteration of Alg. 4,  
568 we select the element with the maximum marginal gain. Next, in the first equality, we use the fact  
569 that  $a_{i,j-1}^I \cup \{x_{i,j}\} = a_{i,j}^I$ . The last equality follows from the fact that for  $f_{\mathcal{D}_c^r}(\emptyset) = 0$ , the sum of  
570 the marginal gains equals to the value of  $f_{\mathcal{D}_c^r}(a^I)$ .

571 Therefore we have:

$$f_{\mathcal{D}_c^r}(a^I) \geq \frac{1}{2} f_{\mathcal{D}_c^r}(a^{\text{OPT}}).$$

572 This concludes the proof, showing that the INTERACTIVE policy achieves at least half of the value  
573 of the optimal solution.  $\square$

### 574 A.3 Experiments

575 To demonstrate the effectiveness of our proposed policy, we conducted simulations in scenarios in-  
576 volving multiple robots engaged in data collection from heterogeneous observation distributions. To  
577 create these heterogenous environments, we sampled incoming class distributions from the Dirichlet  
578 distribution, incorporating a skewness parameter denoted as  $\alpha$ . This way, we ensure that environ-  
579 ments have nonidentical incoming class distributions (non-i.i.d). Then, within each environment,  
580 we simulated robots that observed the same data points.

581 Initially, an initial dataset denoted as  $\mathcal{D}_c^0$  was chosen from the training set to train the initial model  
582  $f_{\text{DNN}}(\cdot; \theta_i^0)$ . The initial dataset was generated with uniform class distribution, employing the Dirich-  
583 let distribution with a skewness parameter value of  $\alpha = 5$ . In each subsequent round, the vision  
584 model was retrained from the pre-trained vision model to ensure a fair evaluation of the performance  
585 using the selected training set. To prevent overfitting, when identical data points were selected from  
586 multiple devices, the redundant instances were filtered out, and only a single data point was added  
587 to the training set.

#### 588 A.3.1 Embedding Functions:

589 To generate embeddings for the data points, we utilized multiple vision and language models de-  
590 pending on the datasets. Initially, we made use of the embeddings generated by the CLIP model  
591 [4], which is trained to create outputs in the same embedding space for both language and vision  
592 model inputs. However, we observed that when the embeddings generated by the CLIP model start  
593 to perform poorly on the datasets when there is a mismatch of the targets of the CLIP model with our  
594 classification output or the images are out-of-distribution for the CLIP model. For these datasets,  
595 we instead employ the embeddings generated by BADGE [33]. BADGE embeddings essentially  
596 correspond to the gradients of the final layer of the network with respect to the input.

#### 597 A.3.2 Classification Experiments

598 In all classification experiments, we used the Adam optimizer with a learning rate of 0.001 with a  
599 batch size of 1000. Additionally, the learning rate scheduler is used with a decay rate of 0.99. We  
600 trained the DNNs in each round for 300 epochs. We did not apply any data augmentation to the  
601 training set. To ensure robustness, we conducted these experiments for 25 different seeds. Now,  
602 we provide additional explanations regarding the details and dataset-specific parameters used in the  
603 simulations.

604 **MNIST:** In our paper, we used the MNIST dataset to show the efficacy of our algorithm in a simple  
605 setting. The MNIST dataset is a collection of handwritten digits that contains 60,000 training images  
606 and 10,000 test images. Each image is a  $28 \times 28$  grayscale image.

607 **Simulation Parameters:** In MNIST simulations, we used 5 heterogeneous environments, each  
608 containing 4 robots that observe identical samples, resulting in a total system of 20 robots. To  
609 create heterogenous incoming class distributions, we set the skewness parameter of the Dirichlet  
610 distribution to  $\alpha = 1.3$ . In each round, robots are observing 1000 data samples and collect  $N^{\text{cache}} =$   
611 3 data samples from their observations. We started with an initial dataset of size 16 and collected  
612 the data for 10 rounds. The final training dataset consists of 616 data points.

613 **DNN and Embedding Function:** We used a simple DNN with 6 layers, with 4 convolutional  
614 layers and 2 fully connected layers. Between each convolutional layer, we used the ReLU activation  
615 function and applied dropout with a probability of 0.3. To create embeddings, we utilized BADGE  
616 [33].

617 **CIFAR-10:** The CIFAR-10 dataset consists of 60,000  $32 \times 32 \times 3$  RGB images with ten different  
618 classes. The dataset is split into training and testing datasets of size 50,000 and 10,000, respectively.  
619 The classes in the dataset are truck, ship, horse, frog, dog, deer, cat, bird, automobile, and airplane.

620 **Simulation Parameters:** In CIFAR-10 simulations, we used 6 heterogeneous environments, each  
621 containing 4 robots that observe identical samples, resulting in a total system of 24 robots. To  
622 create heterogenous incoming class distributions, we set the skewness parameter of the Dirichlet

distribution to  $\alpha = 1.6$ . In each round, robots are observing 1000 data samples and collect  $N^{\text{cache}} = 1$  data samples from observations. We started with an initial dataset of size 10 and collected the data for 10 rounds. The final training dataset consists of 250 data points.

**DNN and Embedding Function:** We leveraged a pre-trained ResNet-50 model [64] as the backbone for our vision model. To adapt it for our task, we replaced the final layer of the ResNet-50 with two fully connected layers, incorporating ReLU activation, and applied dropout with a probability of 0.3 to mitigate overfitting. Only these replaced layers were retrained, following the transfer learning approach. This strategy significantly reduces training time while mitigating overfitting risks. To create embeddings, we utilized embeddings created by the CLIP model [4].

**Adverse-Weather Dataset** The Adverse-Weather dataset comprises numerous RGB image sequences, each with dimensions of  $720 \times 1280 \times 3$ . These sequences were collected from moving vehicles around the University of Michigan campus, capturing diverse weather conditions. While most sequences exhibit dynamic scenes, some of them include static recordings. The dataset includes two metadata classes: weather and time of day. The weather class consists of labels such as rain, fog, snow, sleet, overcast, sunny, and cloudy. The time of day class includes labels for Sunset, Afternoon, and Dusk. By combining these weather and time of day labels, we established a total of 11 classes to train our model on. To avoid redundancy, we subsampled the images from the video sequences, selecting one image every 10 frames. Consequently, we constructed a dataset comprising 36,230 images, which we divided into a training set of 31,701 images and a test set of 4,529 images.

**Simulation Parameters:** In Adverse-Weather simulations, we used 6 heterogeneous environments, each containing 4 robots that observe identical samples, resulting in a total system of 24 robots. To create heterogeneous incoming class distributions, we set the skewness parameter of the Dirichlet distribution to  $\alpha = 1.2$ . In each round, robots are observing 1000 data samples and collect  $N^{\text{cache}} = 1$  data samples from observations. We started with an initial dataset of size 10 and collected the data for 10 rounds. The final training dataset consists of 250 data points.

**DNN and Embedding Function:** We adopted a pre-trained ViT-H14 model [63] as the backbone for our vision model. To adapt it to our specific task, we replaced the final layer of the ViT-H14 with two fully connected layers, employing ReLU activation, and incorporated dropout with a probability of 0.3 to mitigate overfitting. Only these replaced layers were subjected to retraining. This methodology significantly reduces training time while effectively preventing overfitting. To create embeddings, we have utilized BADGE [33].

**DeepDrive Dataset:** The DeepDrive data following the transfer learning approach, only encompasses 100,000 images taken from driving videos in diverse cities and weather conditions. It comprises 70,000 training images, 10,000 validation images, and 20,000 testing images. However, the testing images are not publicly accessible, so our analysis focused solely on the original training and validation datasets. The classification model was designed to predict weather labels, including rainy, snowy, clear, overcast, partly cloudy, and foggy. However, due to a limited number of foggy images (only 181), the foggy class was excluded from the simulations. Consequently, the classification model was trained on a subset of five classes.

**Simulation Parameters:** In DeepDrive simulations, we used 5 heterogeneous environments, each containing 6 robots that observe identical samples, resulting in a total system of 30 robots. To create heterogeneous incoming class distributions, we set the skewness parameter of the Dirichlet distribution to  $\alpha = 3.3$ . In each round, robots observe 1000 data samples and collect  $N^{\text{cache}} = 20$  data samples from observations. We started with an initial dataset of size 50 and collected the data for 20 rounds. The final training dataset consists of 12,050 data points.

**DNN and Embedding Function:** We used a pre-trained ViT-H14[63] model and replaced the final layer of the vision model with 2 fully connected layers with the ReLU activation layer and applied dropout with a probability of 0.3. We only retrained the replaced layers of the network. This approach, known as transfer learning, reduces training time and helps to prevent overfitting. To create embeddings, we utilized BADGE [33].

### 673 A.3.3 Object Detection Experiments

674 We ran object detection experiments on the DeepDrive dataset. As in the classification case, we  
675 used the training and validation images to train our model and report the final mean average precision

(mAP) scores. We used an SGD optimizer with a learning rate of 0.01 in this experiment. We trained the DNNs at the start and end of the data collection rounds. We applied all data augmentations detailed in [65].

**Simulation Parameters:** In object detection experiments, we used 5 heterogeneous environments, each containing 5 robots that observe identical samples, resulting in a total system of 25 robots. We set skewness parameter  $\alpha = 1$ . In each round, robots observe 1000 data samples and collect  $N^{\text{cache}} = 50$  data samples from observations. We started with an initial dataset of size 5000 and collected the data for 20 rounds. The final training dataset consists of 30,000 data points.

**DNN and Embedding Function:** We used a pretrained YOLOv8-small model [65] and retrained all model weights in each training. Since we are dealing with the objects, we utilized the CLIP model [4] to create embeddings.

#### A.4 Object Detection Experiments Metrics

In the object detection experiments, we used several metrics to evaluate the performance of the policies. These metrics include mAP50, representing the mean of average precision at the intersection over union with a threshold of 50%; mAP50-95, denoting the mean of the average precision at the intersection over union for thresholds ranging from 50% to 95%; precision, and recall. We conducted the experiments with 25 different seeds and averaged the metrics across the seeds. We present results in Table 2. Our INTERACTIVE policy shows a similar performance to the CENTRALIZED policy while outperforming the DISTRIBUTED policy. In mAP50 results, the INTERACTIVE policy shows an improvement of 9.2%, whereas, in mAP50-95 results, the INTERACTIVE policy demonstrates a development of 6.1%. Furthermore, our INTERACTIVE policy surpasses the DISTRIBUTED policy in precision and recall results by 11.6% and 6.5%, respectively.

| Method      | mAP@50           | mAP@50-95        | Precision        | Recall           |
|-------------|------------------|------------------|------------------|------------------|
| INITIAL     | $33.2 \pm 0.012$ | $17.7 \pm 0.007$ | $51.5 \pm 0.048$ | $32.7 \pm 0.01$  |
| DISTRIBUTED | $37.2 \pm 0.009$ | $20.2 \pm 0.006$ | $56.3 \pm 0.046$ | $35.5 \pm 0.008$ |
| CENTRALIZED | $46.5 \pm 0.003$ | $26.3 \pm 0.007$ | $67.6 \pm 0.007$ | $42.4 \pm 0.004$ |
| INTERACTIVE | $46.4 \pm 0.002$ | $26.3 \pm 0.002$ | $67.9 \pm 0.007$ | $42.0 \pm 0.003$ |

Table 2: Additional metrics for object detection experiments

#### A.5 Diminishing Returns between accuracy and the percentage of training data

To support our claim about dataset quality being submodular in Assumption 3, and monotone 2. We conducted 5 experiments training classification models on four datasets of varying sizes. In Fig. 5, we show the accuracy of the classification models accuracy across the different percentages of the datasets. We can see in the general plot (Fig. 5-right) and zoomed-in version to smaller percentages ((Fig. 5-left) accuracy shows a diminishing returns property in terms of accuracy as the training dataset size increases. This indicates that the incremental improvement gained from adding new samples decreases with a larger dataset. Additionally, the accuracy of the models consistently increases as the dataset size grows, providing evidence for the monotonicity of dataset quality. These observations align with our assumption about dataset quality being submodular (Assmp. 3) and monotone (Assmp. 2).

#### A.6 Accuracy When Objective Function is Non-submodular, Non-monotone

In this section, we investigate the performance of our INTERACTIVE policy when the objective function  $f$  is not monotone or submodular through experiments. Instead of the submodular facility location function, we employed a variant called the maximin facility location function. This function aims to maximize the minimum distance between any two points in a set. Formally, we can define the maximin facility location function as follows:

$$f_{\text{maximin}}(S) = \max_{s_i \in S} \min_{s_j \in S \setminus \{s_i\}} \|s_i - s_j\|$$

where  $s_i$  is the  $i^{\text{th}}$  point in the set  $S$  and  $\|s_i - s_j\|$  is a distance function. We used the same simulation parameters and models as we did with the facility location objective function. The accuracy results

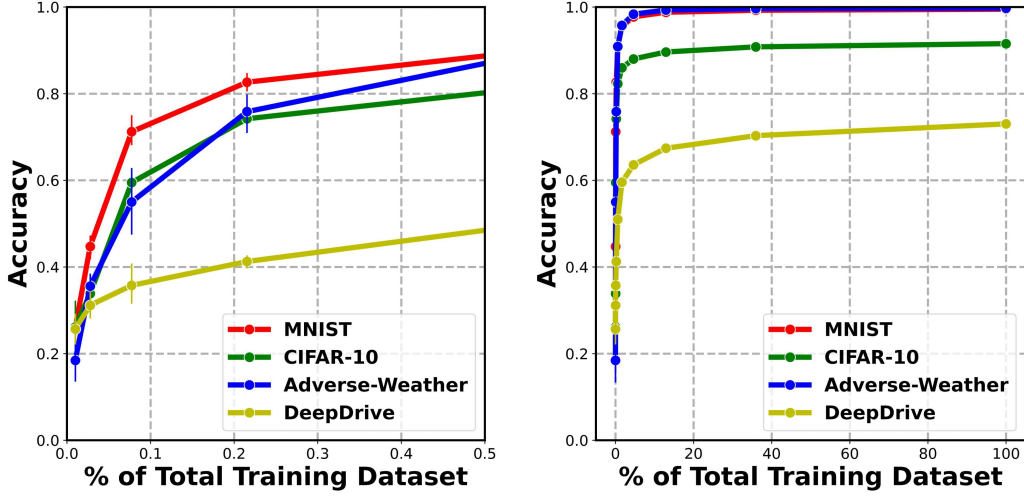

Figure 5: **Accuracy shows diminishing returns to training dataset size.** Each line represents the accuracy of the classification models on a different dataset. The x-axis represents the percentage of datasets used for training the model, while the y-axis represents accuracy. The left figure provides a closer view of the right figure, specifically focusing on training percentages ranging from 0 to 0.5. Across all datasets, we observe a consistent improvement in accuracy as the percentage of training data increases. However, as the dataset size grows, the slope of the curve gradually decreases, indicating diminishing returns where the incremental contributions of new data samples become smaller. This observation supports our assumption of dataset quality function being submodular and monotone.

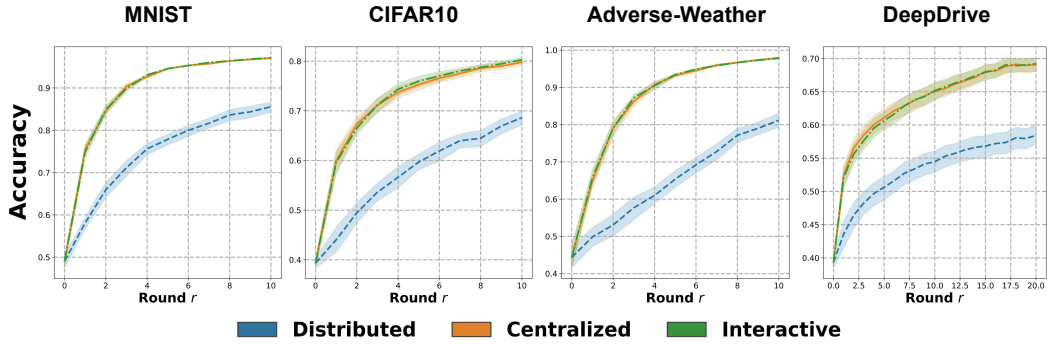

Figure 6: **Comparison of performance under non-monotone and non-submodular objective** We conducted the same experiments as in Fig. 3 but with a non-submodular and non-monotone objective function, described in A.6. Similar to Fig. 3, we observe that both the INTERACTIVE and CENTRALIZED policies outperform the DISTRIBUTED policy by a significant margin. This demonstrates the robustness and effectiveness of the INTERACTIVE and CENTRALIZED policies under non-submodular and non-monotone objectives.

of the simulations are presented in Fig. 6. Similar to the previous case, our INTERACTIVE policy exhibits equivalent performance to the CENTRALIZED policy and outperforms the DISTRIBUTED policy in all simulations.

## A.7 Complexity Analysis

For all algorithms, suppose that there are  $N_{\text{robot}}$  robots, each robot  $i$  observes samples  $X_i^r$  in each data collection round, and in each round at most  $N_i^{\text{cache}}$  samples have to be chosen from samples  $X_i^r$  for each robot  $i$ .



724 It is a known result that the total number of function evaluations of the greedy algorithm that is used  
 725 for submodular maximization is  $O(|V|k)$ , where  $V$  is the ground set for observations and  $k$  is the  
 726 number of data points that need to be selected [51].

727 **The CENTRALIZED Algorithm:** In the CENTRALIZED algorithm, a central server carries out all  
 728 the computation required in a data collection round to choose the samples that are going to be added  
 729 to the cloud dataset. That is, the central server has access to all the observations made by the robots  
 730 and has to select  $N_i^{\text{cache}}$  samples from the observation set  $X_i^r$  of each robot  $i$ . Therefore, our ground  
 731 set is  $\cup_{i=1}^{N_{\text{robot}}} X_i^r$ , and the number of points that need to be selected is  $\sum_{i=1}^{N_{\text{robot}}} N_i^{\text{cache}}$ . Because  
 732 the observed sets  $X_i^r$  of the robots are disjoint, the total number of elements in our ground set is  
 733  $|\cup_{i=1}^{N_{\text{robot}}} X_i^r| = \sum_{i=1}^{N_{\text{robot}}} |X_i^r|$ . This makes the computational complexity of the CENTRALIZED  
 734 algorithm in terms of total number of function evaluations  $O(\sum_{i=1}^{N_{\text{robot}}} |X_i^r| \times \sum_{i=1}^{N_{\text{robot}}} N_i^{\text{cache}})$ .

735 **The DISTRIBUTED Algorithm:** In the DISTRIBUTED algorithm, all robots carry out the data selec-  
 736 tion process themselves. Therefore, for each robot  $i$ , the ground set is  $X_i^r$  and the number of points  
 737 that have to be selected is  $N_i^{\text{cache}}$ . Summing the number of function evaluations over all robots, the  
 738 total complexity of the DISTRIBUTED algorithm is  $O(\sum_{i=1}^{N_{\text{robot}}} |X_i^r| \times N_i^{\text{cache}})$ .

739 **The INTERACTIVE Algorithm:** In our INTERACTIVE algorithm, just like the DISTRIBUTED al-  
 740 gorithm, the robots select data points in the confines of their observation sets. Thus, the ground  
 741 sets and the number of points to be selected from each ground set is again  $X_i^r$  and  $N_i^{\text{cache}}$ , re-  
 742 spectively. Summing again over all robots, the total complexity of our INTERACTIVE algorithm is  
 743  $O(\sum_{i=1}^{N_{\text{robot}}} |X_i^r| \times N_i^{\text{cache}})$ , which is the same as the DISTRIBUTED algorithm.

744 **Number of Message Exchanges:** Since our problem is distributed in nature, we should also ana-  
 745 lyze the total number of messages passed between robots. The CENTRALIZED algorithm requires  
 746  $\sum_{i=1}^{N_{\text{robot}}} N_i^{\text{cache}}$  iterations over all robots, resulting in total of  $O(N_{\text{robot}} \sum_{i=1}^{N_{\text{robot}}} N_i^{\text{cache}})$  message  
 747 exchanges. On the other hand, our INTERACTIVE policy requires only one iteration over all robots,  
 748 leading to a significantly lower number of message exchanges, specifically  $O(N_{\text{robot}})$ . Lastly, since  
 749 the DISTRIBUTED policy is executed without any interaction between robots, there are no message  
 750 exchanges involved.
